# Supplementary material
Source: publisher figshare collection journal article supplement (https://tandf.figshare.com/ndownloader/files/22643270)
Supplement: Supplementary file 1 [file 22643270]

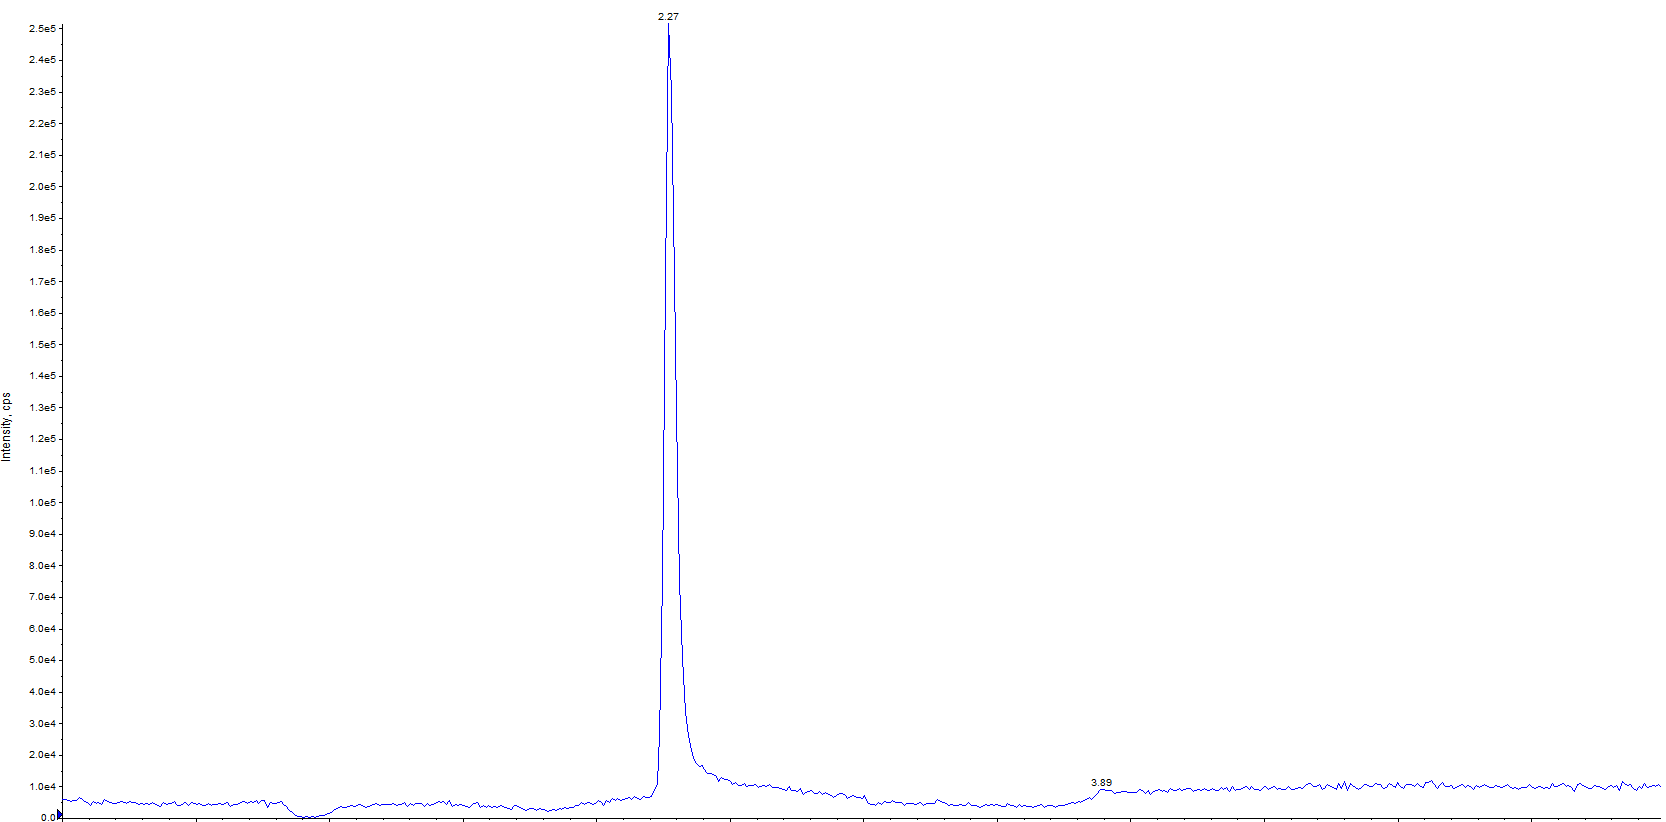

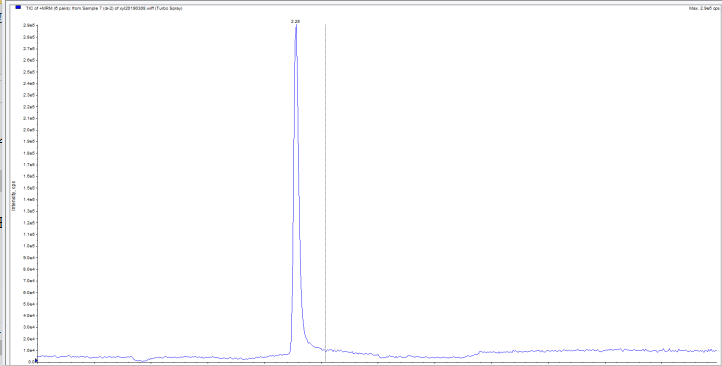

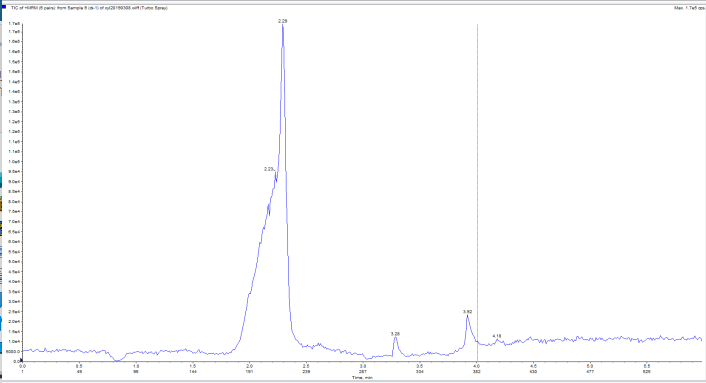


c

b

a

Fig. S1 The chromatogram of optimization of mobile phase (a: mixture of 50% MeOH and water solution; b: ACN, and MeOH; c: 0.05% formic acid water+CAN

Fig. S2 Final residue results of 7 d and 14 d in different matrix
